# Supplementary material for: Identifying CpG sites with different differential methylation frequencies in colorectal cancer tissues based on individualized differential methylation analysis
Source: PubMed Central journal article supplement (PMC5564570; doi:10.18632/oncotarget.17647), 2017-05-07
Supplement: oncotarget-08-47356-s001.pdf [file oncotarget-08-47356-s001.pdf]

## Identifying CpG sites with different differential methylation frequencies in colorectal cancer tissues based on individualized differential methylation analysis

### Supplementary Materials

**Supplementary Table 1: Population-level DM CpG sites identified in two independent datasets for colorectal cancers**

| Tissue     | Dataset  | Num_hyper | Num_hypo | Con_hyper | Con_hypo | Con_score |
|------------|----------|-----------|----------|-----------|----------|-----------|
| Colorectum | GSE42752 | 3484      | 3836     | 2754      | 3227     | 98.69%    |
|            | GSE48684 | 4356      | 5606     |           |          |           |

Note: Num\_hyper and Num\_hypo represent the numbers of hypermethylated and hypomethylated CpG sites, respectively. Con\_hyper and Con\_hypo represent the numbers of concordant hypermethylated and hypomethylated CpG sites. Con\_score is the concordance score.

**Supplementary Table 2: 143 genes that were hypomethylated in more than 95% of the 268 CRC samples. See Supplementary\_Table\_2**

**Supplementary Table 3: 12 hypermethylated genes associated with OS of early stage CRC patients treated with surgical resection only**

| Gene ID | Gene symbol | Average OS times(month)of patients with hypermethylated genes | Proportion of patients with hypermethylated genes | Average OS times(month) of patients without hypermethylated genes | P-value |
|---------|-------------|---------------------------------------------------------------|---------------------------------------------------|-------------------------------------------------------------------|---------|
| 54959   | ODAM        | 28.1480                                                       | 0.2427                                            | 28.9769                                                           | 0.0009  |
| 5100    | PCDH8       | 30.9440                                                       | 0.5146                                            | 26.4773                                                           | 0.0030  |
| 2587    | GALR1       | 28.2230                                                       | 0.7184                                            | 30.1862                                                           | 0.0043  |
| 6247    | RS1         | 23.6515                                                       | 0.2136                                            | 30.1675                                                           | 0.0044  |
| 254427  | PROSER2     | 29.4410                                                       | 0.3786                                            | 28.3703                                                           | 0.0048  |
| 25861   | WHRN        | 30.3016                                                       | 0.7864                                            | 23.1576                                                           | 0.0056  |
| 79034   | C7orf26     | 32.4606                                                       | 0.6990                                            | 20.2172                                                           | 0.0072  |
| 79575   | ABHD8       | 31.5061                                                       | 0.4757                                            | 26.2981                                                           | 0.0074  |
| 160728  | SLC5A8      | 27.9383                                                       | 0.3883                                            | 29.3074                                                           | 0.0092  |
| 260436  | FDCSP       | 32.1017                                                       | 0.3883                                            | 26.6640                                                           | 0.0096  |
| 1816    | DRD5        | 30.0129                                                       | 0.4757                                            | 27.6531                                                           | 0.0097  |
| 664     | BNIP3       | 20.3984                                                       | 0.2039                                            | 30.9211                                                           | 0.0100  |

**Eight hypomethylated genes associated with OS of early stage CRC patients treated with surgical resection only**

| Gene ID | Gene symbol | Average OS times(month)<br>of patients with<br>hypomethylated genes | Proportion of patients<br>with hypomethylated<br>genes | Average OS times(month)<br>of patients without<br>hypomethylated genes | <i>P</i> -value |
|---------|-------------|---------------------------------------------------------------------|--------------------------------------------------------|------------------------------------------------------------------------|-----------------|
| 942     | CD86        | 28.7430                                                             | 0.7379                                                 | 28.8679                                                                | 0.0033          |
| 7201    | TRHR        | 28.6516                                                             | 0.7961                                                 | 29.2603                                                                | 0.0043          |
| 115352  | FCRL3       | 27.8721                                                             | 0.8350                                                 | 33.3471                                                                | 0.0045          |
| 922     | CD5L        | 29.0502                                                             | 0.8252                                                 | 27.4796                                                                | 0.0052          |
| 2554    | GABRA1      | 35.0136                                                             | 0.2621                                                 | 26.5596                                                                | 0.0057          |
| 90655   | TGIF2LY     | 30.2346                                                             | 0.7573                                                 | 24.2240                                                                | 0.0063          |
| 26160   | IFT172      | 29.3417                                                             | 0.3495                                                 | 28.4716                                                                | 0.0077          |
| 51438   | MAGEC2      | 28.3498                                                             | 0.7864                                                 | 30.3439                                                                | 0.0081          |
